# Supplementary material
Source: publisher site journal article supplement (https://www.spandidos-publications.com/6029/downloadSupplementary)
Supplement: Supplementary file 1 [file downloadSupplementary]

## Sheet: classical_up_SAHA_vs_con
Supplementary Table IV: Upregulated genes in classical cell lines (PaTu-S, Capan-1, Capan-2, Colo357) after 24h SAHA (0.5µM) treatment compared to control-treated cell lines
n=49	BaseMean	log2Fold Change	lFCSE	Stat	P-value	Padj	Symbol
ENSG00000258539	0.705149	18.4006	3.73872	4.92165	8.58196e-07	0.00201383	AC068896.1
ENSG00000168702	0.898224	18.287	3.52002	5.19514	2.04561e-07	0.000640026	LRP1B
ENSG00000269506	0.594446	18.0142	3.75193	4.80131	1.5763e-06	0.00295914	AC110792.2
ENSG00000280800	0.441134	15.7172	3.76967	4.16939	3.05421e-05	0.0238898	FP671120.6
ENSG00000254851	0.456857	14.9944	3.76925	3.97808	6.94754e-05	0.0416246	AP005018.2
ENSG00000187024	0.556926	14.4941	3.76611	3.84856	0.000118813	0.0631256	PTRH1
ENSG00000260926	0.518152	14.4441	3.77718	3.82406	0.000131274	0.06721	AC016134.1
ENSG00000241404	0.449952	14.3341	3.76932	3.80284	0.000143047	0.0718293	EGFL8
ENSG00000182021	0.450242	14.2453	3.77814	3.77045	0.000162952	0.0791134	AL591379.1
ENSG00000214773	0.494961	14.1145	3.76926	3.74462	0.000180665	0.0830782	AC112512.1
ENSG00000186049	0.427954	13.903	3.77593	3.68201	0.000231404	0.0987289	KRT73
ENSG00000236878	1.03162	13.6634	3.42956	3.98402	6.77586e-05	0.0414785	MTATP6P26
ENSG00000152580	55.7083	2.21018	0.47302	4.67249	2.97565e-06	0.00465507	IGSF10
ENSG00000179344	57.7855	2.14402	0.404974	5.2942	1.19537e-07	0.000606021	HLA-DQB1
ENSG00000117322	53.2947	1.81972	0.441097	4.12545	3.70005e-05	0.0273936	CR2
ENSG00000101955	67.5357	1.79559	0.386882	4.64119	3.4641e-06	0.00507357	SRPX
ENSG00000105290	452.913	1.76466	0.292441	6.03423	1.5972e-09	2.24877e-05	APLP1
ENSG00000188404	82.5437	1.44548	0.350872	4.11968	3.79399e-05	0.0273936	SELL
ENSG00000092068	147.046	1.42423	0.282625	5.03929	4.67253e-07	0.00119613	SLC7A8
ENSG00000203778	102.56	1.26911	0.286955	4.42268	9.74822e-06	0.00915001	FAM229B
ENSG00000171992	102.431	1.21044	0.32348	3.74192	0.000182623	0.0830782	SYNPO
ENSG00000128872	196.145	1.12847	0.233414	4.83464	1.33386e-06	0.00268287	TMOD2
ENSG00000140545	552.426	1.07038	0.291048	3.67767	0.000235373	0.0989235	MFGE8
ENSG00000240694	191.027	1.06733	0.28603	3.73153	0.000190317	0.0850657	PNMA2
ENSG00000186868	242.925	1.05797	0.269652	3.92348	8.72807e-05	0.0491547	MAPT
ENSG00000055163	542.971	1.04595	0.232625	4.49631	6.9142e-06	0.00748835	CYFIP2
ENSG00000021300	721.188	1.02136	0.266911	3.8266	0.000129928	0.06721	PLEKHB1
ENSG00000118523	770.713	0.99404	0.219299	4.5328	5.82069e-06	0.00655619	CCN2
ENSG00000154146	717.09	0.954823	0.245738	3.88553	0.000102108	0.0563777	NRGN
ENSG00000213949	265.489	0.95126	0.206009	4.61756	3.8828e-06	0.00520647	ITGA1
ENSG00000108828	1549.88	0.902217	0.205558	4.38912	1.13812e-05	0.0103382	VAT1
ENSG00000167552	671.02	0.894079	0.190692	4.68861	2.7507e-06	0.00465507	TUBA1A
ENSG00000126709	483.463	0.889107	0.21444	4.14617	3.3808e-05	0.0257298	IFI6
ENSG00000049323	275.446	0.883056	0.19228	4.59254	4.37881e-06	0.00560468	LTBP1
ENSG00000186854	756.191	0.873153	0.213547	4.08881	4.33587e-05	0.0297789	TRABD2A
ENSG00000148180	716.037	0.872294	0.190445	4.58029	4.64327e-06	0.00568477	GSN
ENSG00000137821	225.829	0.866724	0.195297	4.43798	9.08087e-06	0.00881753	LRRC49
ENSG00000121064	864.853	0.773859	0.193255	4.00435	6.21891e-05	0.0389934	SCPEP1
ENSG00000120885	3061.67	0.773583	0.205686	3.76098	0.000169246	0.0807765	CLU
ENSG00000145730	1053.52	0.740945	0.14402	5.14473	2.67899e-07	0.000754376	PAM
ENSG00000184500	233.024	0.720212	0.179501	4.0123	6.01297e-05	0.0389934	PROS1
ENSG00000005448	597.839	0.716234	0.160559	4.46088	8.16219e-06	0.00851256	WDR54
ENSG00000198734	740.806	0.712915	0.167424	4.25813	2.06141e-05	0.0165849	F5
ENSG00000167074	276.16	0.706498	0.176454	4.00387	6.23141e-05	0.0389934	TEF
ENSG00000254166	1419.28	0.677889	0.152501	4.44514	8.78346e-06	0.00881753	CASC19
ENSG00000144824	617.472	0.667958	0.154482	4.32385	1.53332e-05	0.012699	PHLDB2
ENSG00000169891	423.641	0.604254	0.139206	4.34072	1.42018e-05	0.0121184	REPS2
ENSG00000100612	1297.39	0.599214	0.152053	3.94084	8.11971e-05	0.047634	DHRS7
ENSG00000135677	3899.39	0.42477	0.114398	3.71307	0.000204758	0.0900904	GNS
